# Supplementary material for: Human papillomavirus prevalence among men in sub-Saharan Africa: a systematic review and meta-analysis
Source: HighWire-hosted journal article supplement (doi:10.1136/sextrans-2013-051456), 2014-05-07
Supplement: sextrans-2013-051456supp_DanishAbstract.pdf [file sextrans-2013-051456supp_DanishAbstract.pdf]

**Baggrund:** Vi udførte et systematisk review og en meta-analyse for at opsummere det tilgængelige data vedrørende prævalensen af Human Papillomavirus (HPV) blandt mænd i Afrika Syd for Sahara.

**Metode:** PubMed og Embase blev søgt frem til den 10. marts 2014. Vi anvendte random effects meta-analyse til at beregne den poolede overordnede HPV prævalens (any HPV) og høj-risiko (HR) HPV prævalens.

**Resultater:** Vi identificerede 11 studier der omfattede i alt 9342 mænd. Vi fandt at HPV er meget hyppig blandt mænd i Afrika Syd for Sahara og at prævalensen af HPV varierede fra 19,1% til 100%. Ved hjælp af random effects meta-analyse fandt vi at den poolede prævalens af any HPV var 78,2% (95% CI: 54,2-91,6) blandt HIV-positive og 49,4% (95% CI: 30,4-68,6) blandt HIV-negative mænd ( $p=0.0632$ ). Når analyserne blev begrænset til PCR-baserede studier var den poolede prævalens af any HPV 84,5% (95% CI: 74,2-91,2) blandt HIV-positive og 56,4% (95% CI: 49,7-62,9) blandt HIV-negative mænd ( $p<0.0001$ ). Blandt de HPV-typer der er omfattet af den ni-valente HPV-vaccine var HPV16 og HPV52 de hyppigste HR HPV typer og HPV6 var den hyppigste lav-risiko (LR) HPV type. Vi undersøgte prævalensen af HPV i forhold til alder, men fandt ingen tydelig tendens i den aldersspecifikke HPV prævalens.

**Konklusion:** Prævalensen af HPV er høj blandt mænd i Afrika Syd for Sahara, hvilket sandsynligvis bidrager til de høje rater af penis- og livmoderhalskræft i denne del af verden. Implementering af de profylaktiske HPV-vacciner kunne potentielt være med til at forebygge den høje forekomst af HPV og HPV-relaterede sygdomme i Afrika Syd for Sahara.

**Disclaimer:** BMJ Publishing Group Limited takes no responsibility for the accuracy of the translation from the published English original and is not liable for any errors that may occur.
